# Supplementary material for: Potent Activity of Composite Cyclin Dependent Kinase Inhibition against Hepatocellular Carcinoma
Source: MDPI journal article supplement (doi:10.3390/cancers11101433), 2019-09-26

Figure S1. Western blot analysis results indicating the expression of various CDKs and their downstream molecules after transfection with siRNAs for 72 hours.

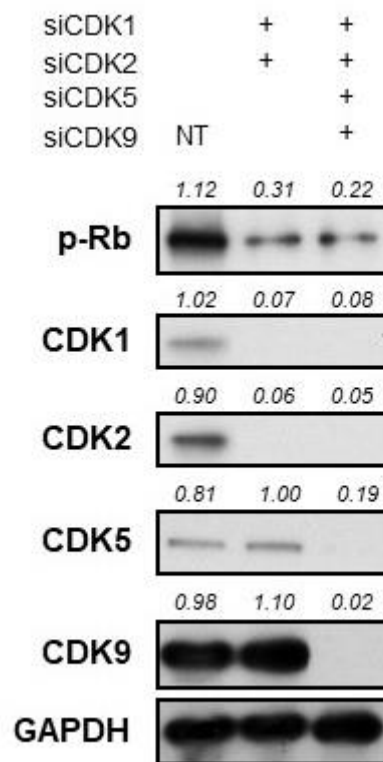

Supplement: s1 [file s1]
